# Supplementary material for: Overexpression of the Promigratory and Prometastatic PTK7 Receptor Is Associated with an Adverse Clinical Outcome in Colorectal Cancer
Source: PubMed Central journal article supplement (PMC4427440; doi:10.1371/journal.pone.0123768), 2015-05-11
Supplement: pone.0123768.s004.pdf [file pone.0123768.s004.pdf]

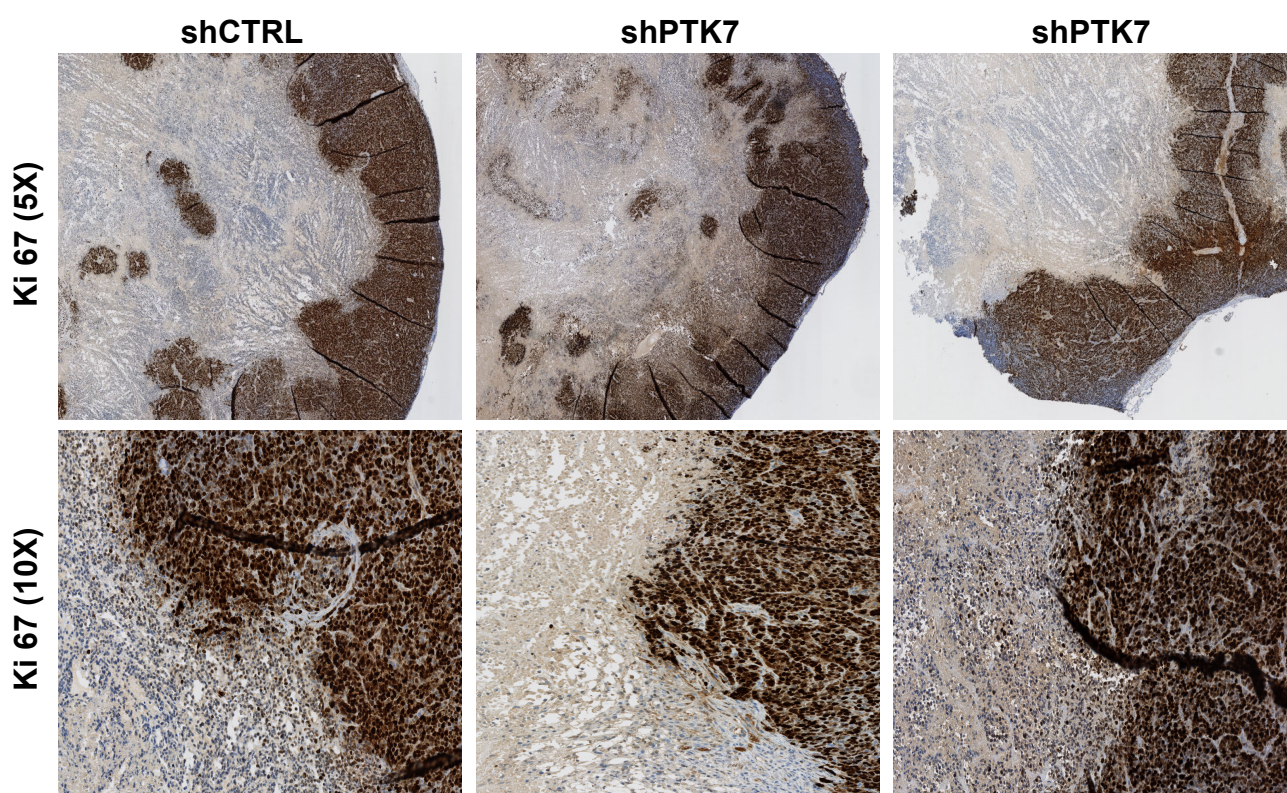

Lhoumeau and Martinez, Fig S4
